# Supplementary material for: FeOOH nanosheet assisted metal ion coordination with porphyrins for rapid detection and removal of cadmium ions in water
Source: Royal Society of Chemistry journal article supplement (doi:10.1039/d2ay01508k), 2022-01-01
Supplement: d2ay01508k1.pdf [file d2ay01508k1.pdf]

## Supporting Information

### *FeOOH nanosheets assisted metal ion coordination with porphyrins for rapid detection and removal of cadmium ions in water*

Zheng Li<sup>a,†</sup>, Chang He<sup>a,†</sup>, Xiangming Zhou<sup>a</sup>, Lixiang Wang<sup>a</sup>, Ying Zhang<sup>a</sup>, Guangfu Feng<sup>\*a</sup>, Jun Fang<sup>\*a</sup>

<sup>a</sup> School of Bioscience and Biotechnology, Hunan Agricultural University, Changsha 410128, China

<sup>†</sup> These authors contributed equally to this work.

\* Corresponding author:

Tel: +86-15084819640

Email: [GuangfuFeng@hunau.edu.cn](mailto:GuangfuFeng@hunau.edu.cn) (G. Feng)  
[fangjun1973@hunau.edu.cn](mailto:fangjun1973@hunau.edu.cn)

**Table S1.** Comparison of cadmium ion detection systems.

| Testing method | Linear range           | Detection limit    | References |
|----------------|------------------------|--------------------|------------|
| Colorimetry    | 0-1.0 $\mu\text{M}$    | 0.18 $\mu\text{M}$ | [1]        |
| Fluorescence   | 0.22-500 $\mu\text{M}$ | 0.22 $\mu\text{M}$ | [2]        |
| Fluorescence   | 0.2-12 $\mu\text{M}$   | 0.12 $\mu\text{M}$ | [3]        |
| Fluorescence   | 0-26.8 $\mu\text{M}$   | 0.2 $\mu\text{M}$  | [4]        |
| Colorimetry    | 0.01-0.12 mM           | 0.21 $\mu\text{M}$ | [5]        |
| Colorimetry    | 0.5-10 $\mu\text{M}$   | 0.24 $\mu\text{M}$ | This work  |

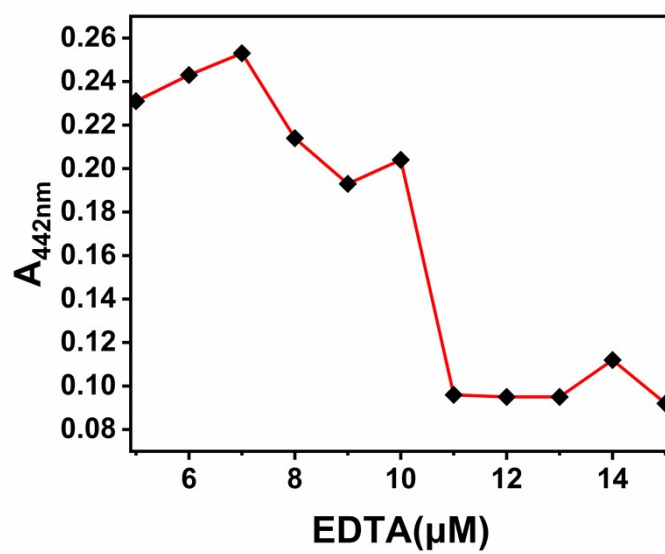

**Figure S1.** UV-Vis absorption spectrum of  $\text{FeOOH@TMPyP4@Cd}^{2+}$  ( $[\text{Cd}^{2+}] = 10 \mu\text{M}$ ) after the addition of EDTA.

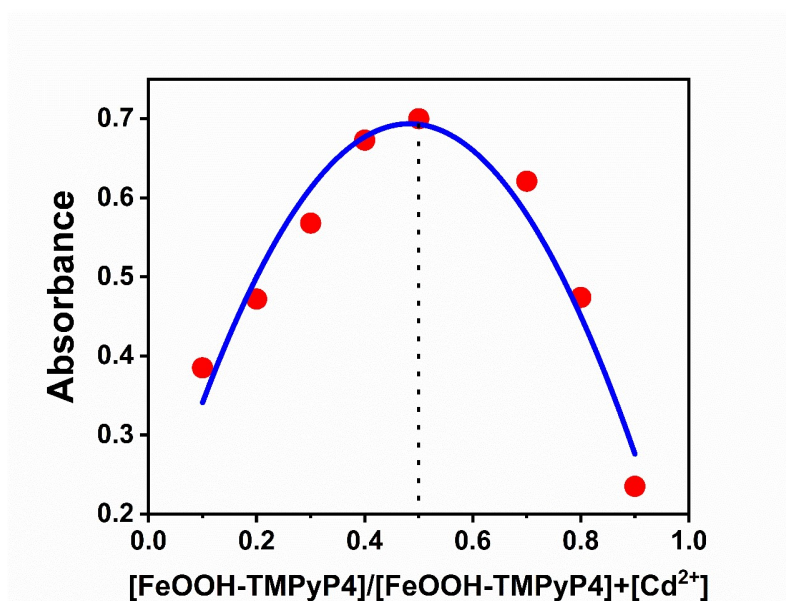

**Figure S2.** Job plot diagram of FeOOH-TMPyP4 and cadmium ions. ( $[\text{FeOOH}] + [\text{Cd}^{2+}] = 10 \mu\text{M}$ )

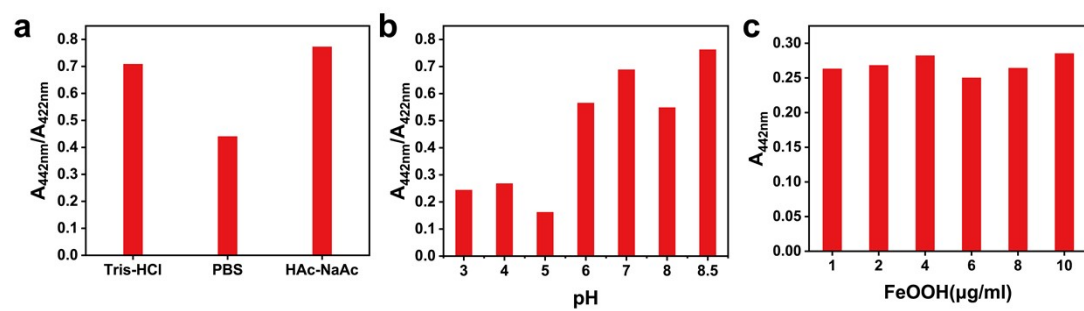

**Figure S3.** Optimization of the type of buffer (a), the pH value of the buffer (b) and the concentration of FeOOH nanosheets (c).

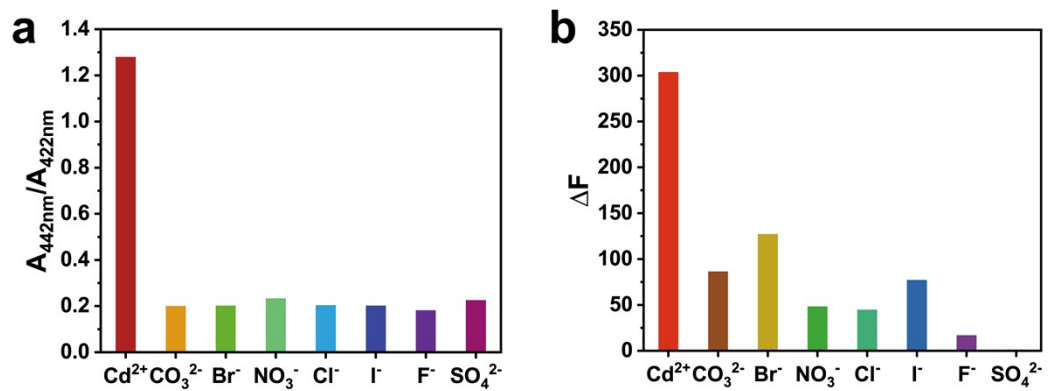

**Figure S4.** Relative absorbance (a) and fluorescence intensity (b) of FeOOH@TMPyP4 nanocomposite in the presence of Cd<sup>2+</sup> and other anions.

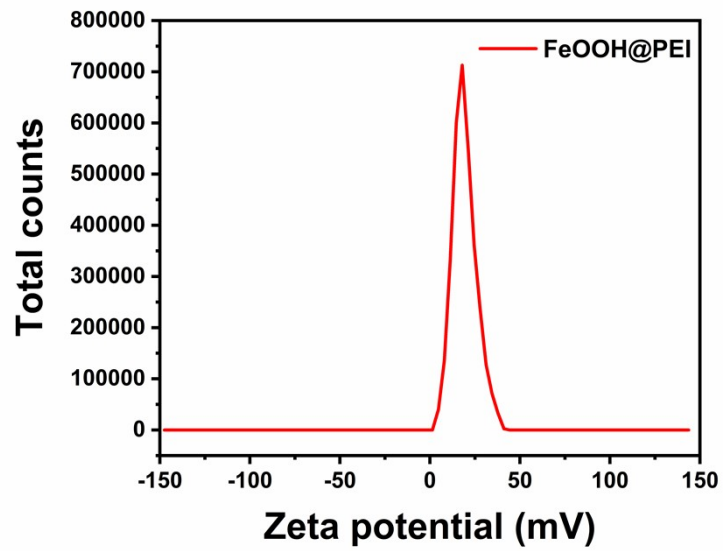

**Figure S5.** Zeta potential measurements of the PEI-modified FeOOH nanosheets.

## References

1. X.-Y. Xu and B. Yan, *Sens. Actuators B Chem.*, 2016, **222**, 347-353.
2. A. Shahat, H. M. Hassan and H. M. Azzazy, *Anal. Chim. Acta*, 2013, **793**, 90-98.
3. Y. Pan, J. Wang, X. Guo, X. Liu, X. Tang and H. Zhang, *J. Colloid Interface Sci.*, 2018, **513**, 418-426.
4. Q. Tan, X. Li, L. Wang, J. Zhao, Q. Yang, P. Sun, Y. Deng and G. Shen, *Front. Chem.*, 2022, 1234.
5. J. Charoensuk, J. Thonglao, B. Wichaiyo, K. Mukdasai, Y. Santaladchaiyakit, S. Srijaranai and S. Mukdasai, *Microchem. J.*, 2021, **160**, 105666.
